# Supplementary figures and images for: Pain management on a trauma service: a crisis reveals opportunities
Source: HighWire-hosted journal article supplement (doi:10.1136/tsaco-2021-000862), 2022-03-01

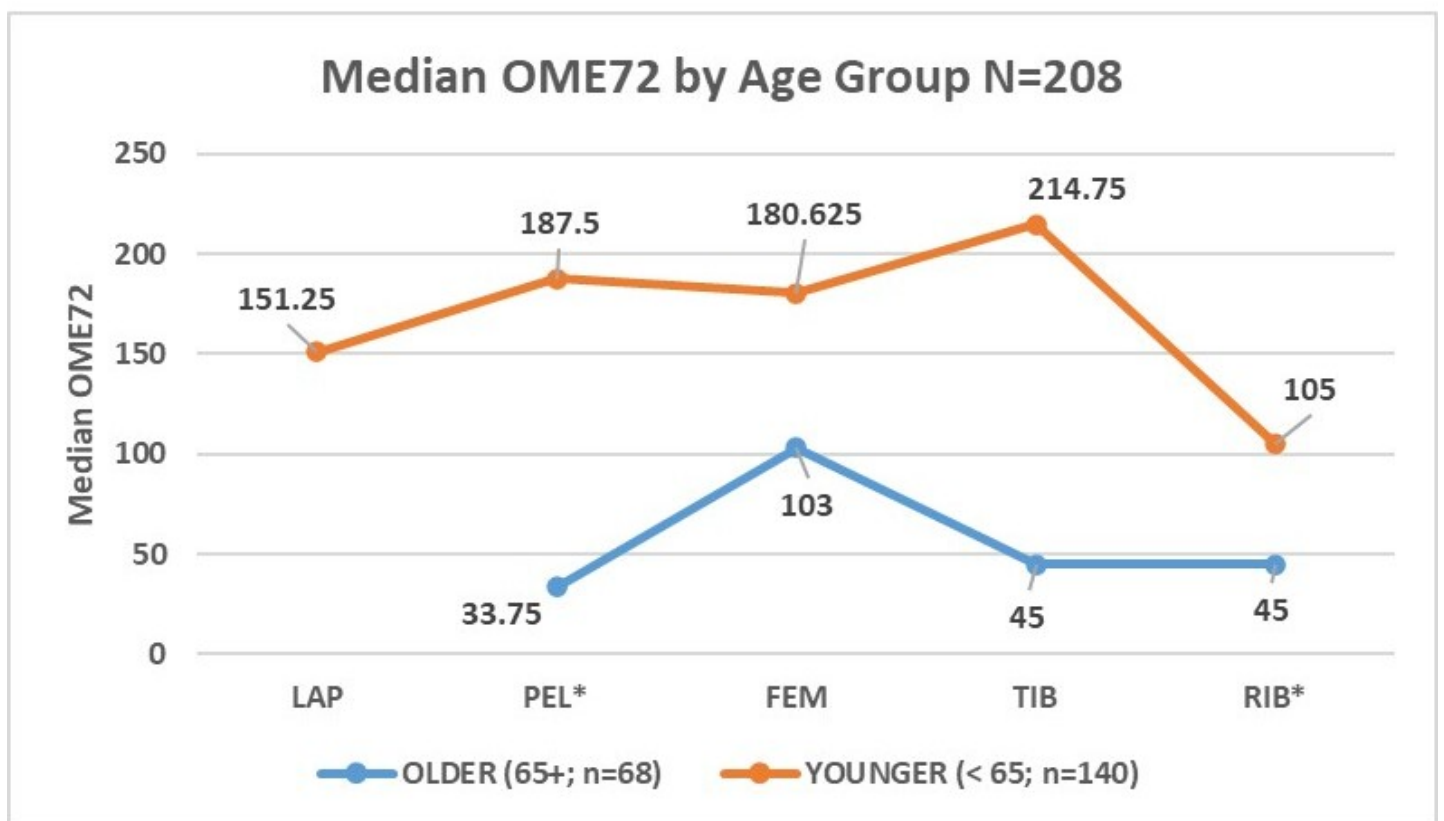

Supplement: tsaco-2021-000862supp001_data_supplement.pdf [file tsaco-2021-000862supp001_data_supplement.pdf]
